# Supplementary material
Source: publisher figshare collection journal article supplement (https://tandf.figshare.com/ndownloader/files/16701407)
Supplement: Supplementary file 1 [file 16701407]

## SUPPLEMENTARY APPENDIX

This appendix has been provided by the authors to give readers additional information about their work.

Supplement to:

**A microfluidic system integrated one-step PCR and high-resolution melting analysis for rapid rice mutant detection**

Cancan Zhu, Xiaosong Wu, Zhigang Li, Jun Zhao, Yong Liu, An Wang, Guoqing Deng and Ling Zhu

Biotechnol. Biotechnol. Equip. 2019, **33**

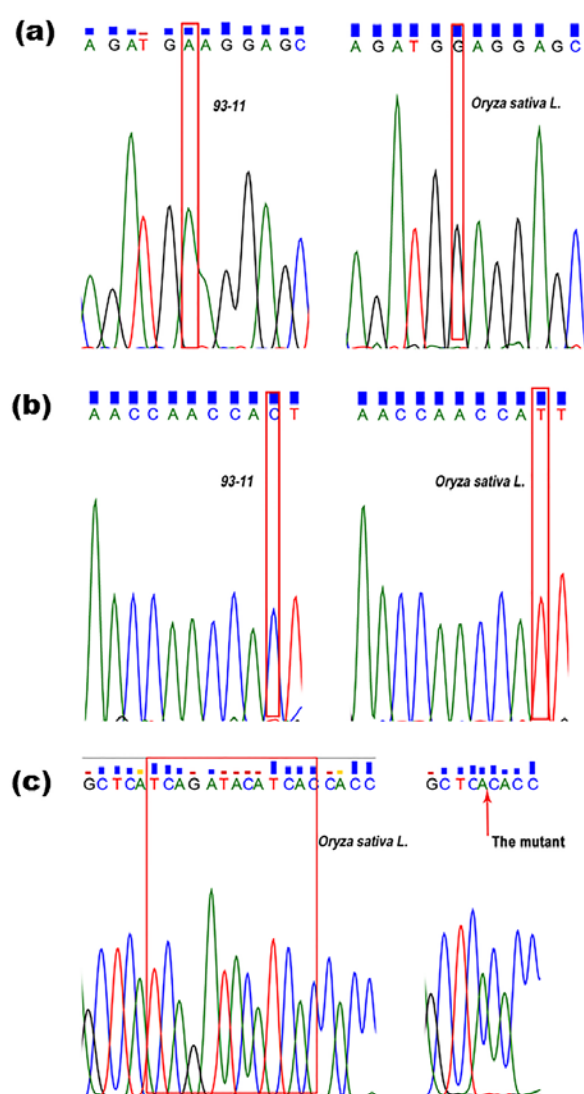

**Supplemental Figure S1.** Sanger sequencing of PCR amplification product reveals base mutations in different varieties of rice.
